# Supplementary material
Source: PubMed Central journal article supplement (PMC7814660)

**a**

Raw image for Extended Data Fig. 1b

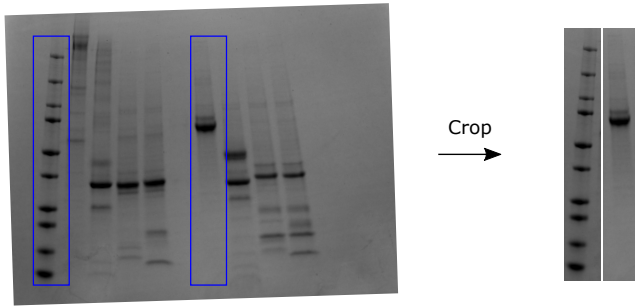

**b**

Raw image for Extended Data Fig. 1g

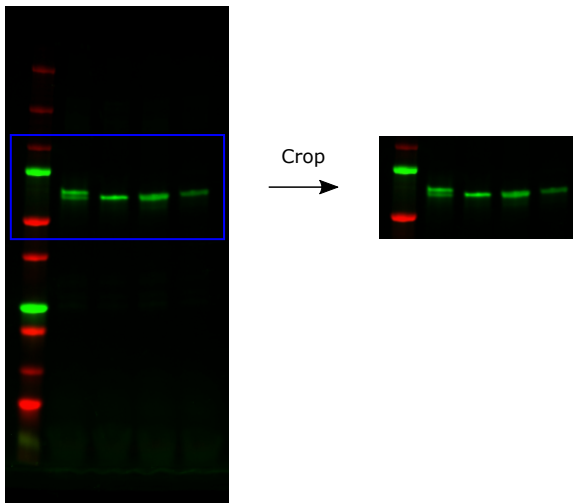

Supplement: NIHMS1658904-supplement-Supplementary_Figure_1.pdf [file NIHMS1658904-supplement-Supplementary_Figure_1.pdf]
